# Supplementary material for: Towards personalized antibody cancer therapy: development of a microfluidic cell culture device for antibody selection
Source: Royal Society of Chemistry journal article supplement (doi:10.1039/d2lc00918h), 2022-01-01
Supplement: d2lc00918h1.pdf [file d2lc00918h1.pdf]

## Supplementary Information

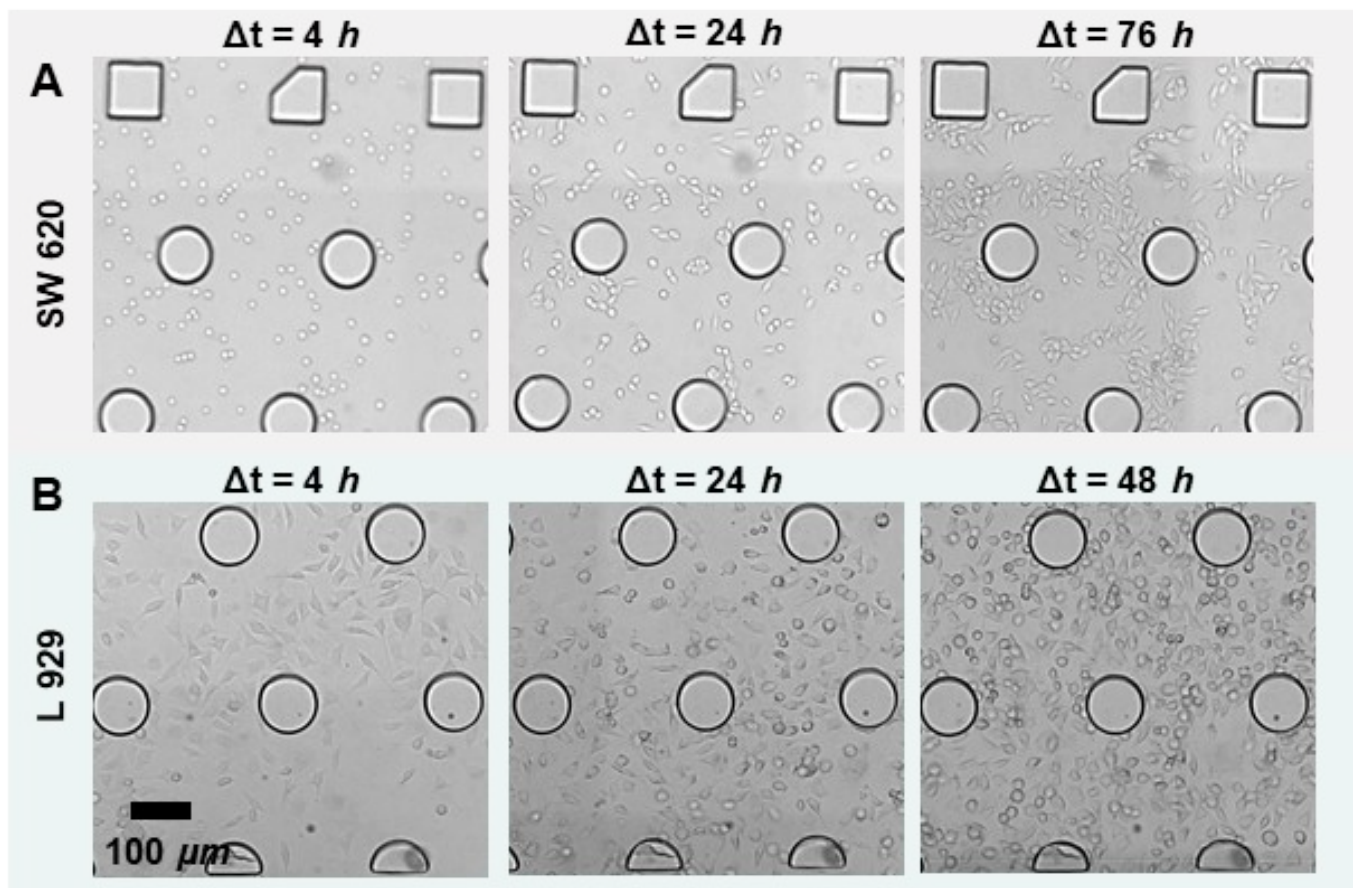

**Figure S1** – Cell culture of human colorectal adenocarcinoma SW620 (ECACC, ECACC 87051203) cells and L929 murine fibroblasts (ECACC, ECACC 85011425) at different timepoints. Both cell lines were cultured in Dulbecco's Modified Eagle Medium (DMEM) cell culture medium (Gibco). Culture medium was supplemented with 10% heat inactivated fetal bovine serum (Biowest) and 100 U/mL penicillin and 100  $\mu g/mL$  streptomycin (Gibco) and maintained at 37 °C, 5% CO<sub>2</sub> in a saturated atmosphere.

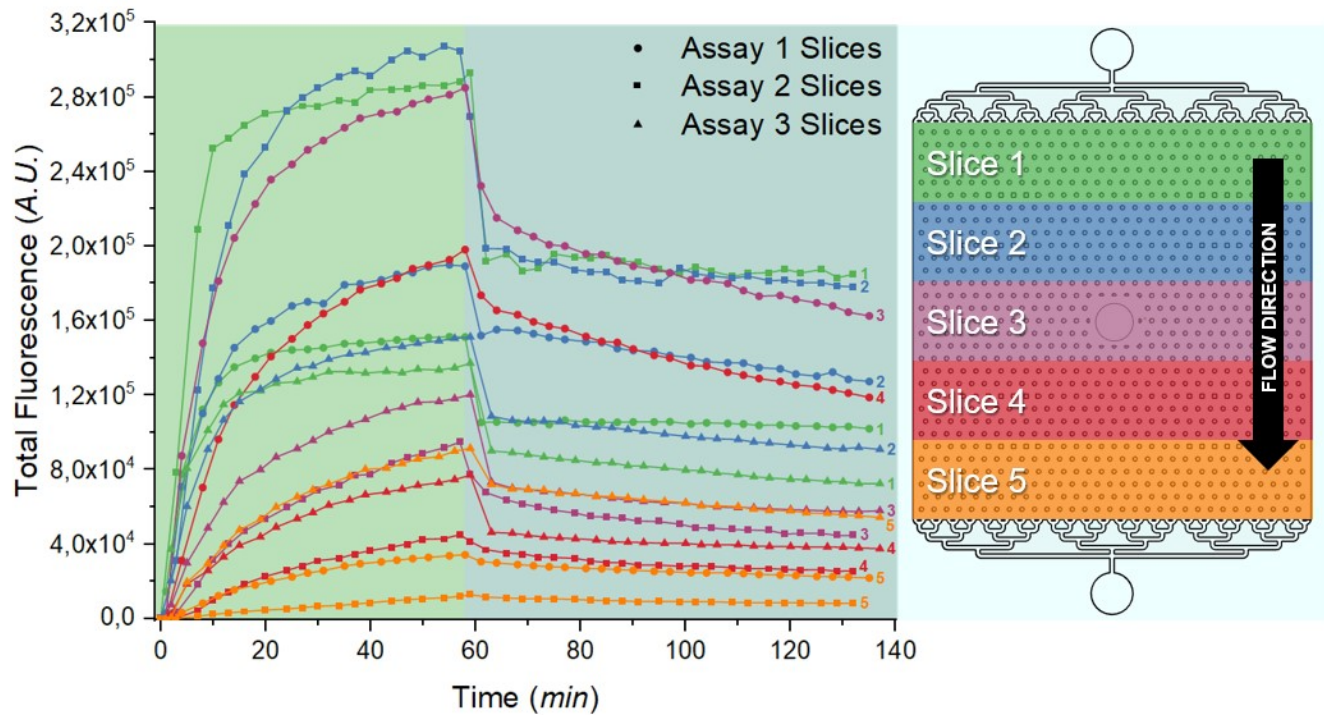

**Figure S2** – Fluorescent signal acquired after the injection of anti-CXCR4 labeled phages. The microfluidic device was divided into five slices, numbered from the inlet (1) to the outlet (5). From 0-60 *minutes* it is possible to follow the capture and from 60-140 *minutes* it is possible to see the wash with culture medium. In this figure, it is possible to observe that the first slices, generally, capture more phages with the curves with different behavior being associated with cell distribution heterogeneity.

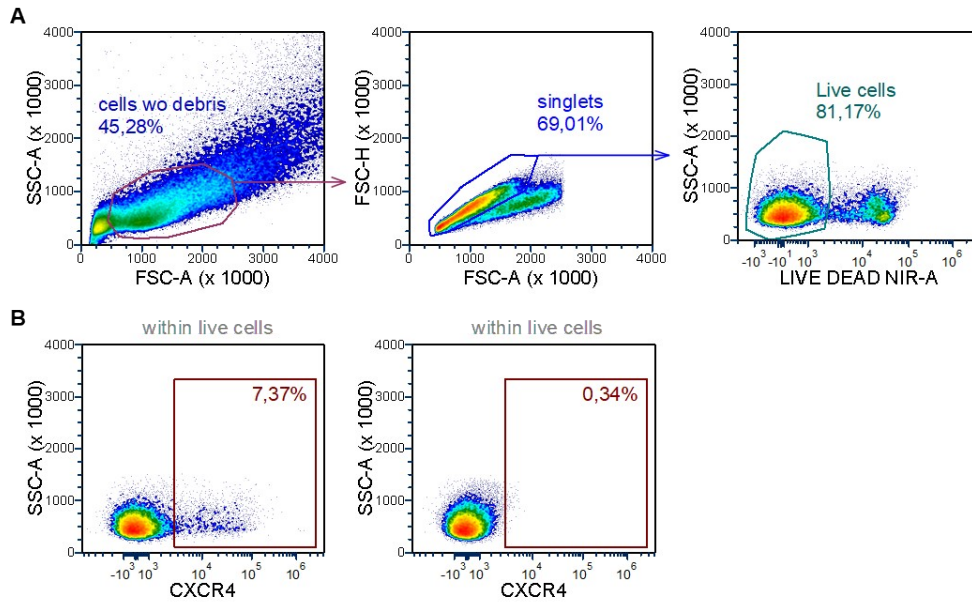

**Figure S3** – Gating strategy for flow cytometry data (A) and CXCR4 surface expression in HCT116 cells (B, left panel; right panel is the control without mAb anti-CXCR4).

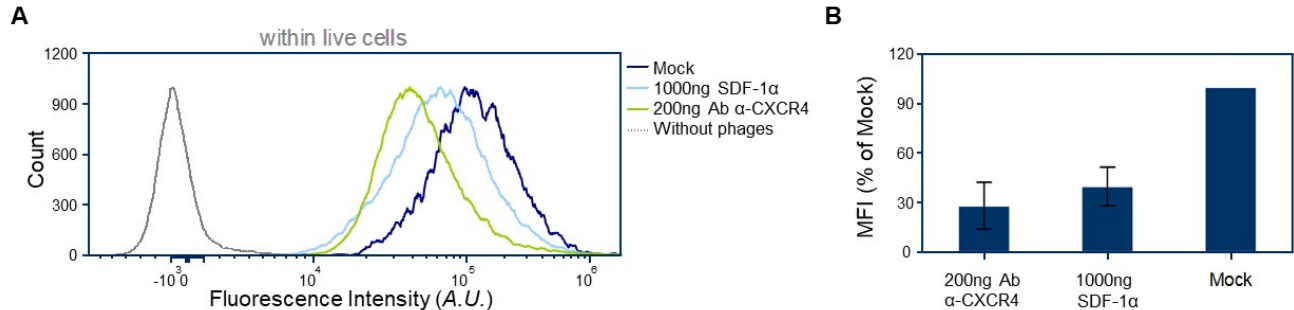

**Figure S4** – Phage binding assessment upon SDF-1 $\alpha$  (1000 ng) or mAb  $\alpha$ -CXCR4 (200 ng) pre-incubation using flow cytometry. A ratio of  $1.0 \times 10^4$  phages/cell was used to a total of  $2.0 \times 10^5$  HCT116 cells. (A) Representative histogram showing fluorescence intensity corresponding to phage binding upon each treatment. (B) Median fluorescence intensity (MFI) for phage binding after treatment with 200 ng of mAb  $\alpha$ -CXCR4 or 1000 ng of SDF-1 $\alpha$ , using flow cytometry. Data is represented as mean of fluorescence ( $\pm$ SDs) relative to mock condition

**Table S1** – Data input and output from GraphPad Prism 7.0. To calculate the KD, the model Association then dissociation (non linear regression). To use this model the values HotNM (phage concentration in *nM*, row 3) and Time0 (time at which dissociation was initiated, row 7) were manually defined.

| Nonlin fit |                               | A                      | B                      | C                     |
|------------|-------------------------------|------------------------|------------------------|-----------------------|
|            |                               | Assay 1                | Assay 2                | Assay 3               |
|            |                               | Y                      | Y                      | Y                     |
| 1          | Association then dissociation |                        |                        |                       |
| 2          | Best-fit values               |                        |                        |                       |
| 3          | HotNM                         | = 0.9963               | = 0.9963               | = 0.9963              |
| 4          | Kon                           | 133276269              | 120853076              | 136292771             |
| 5          | Koff                          | 0.006566               | 0.004981               | 0.00667               |
| 6          | Bmax                          | 742941                 | 989235                 | 598692                |
| 7          | Time0                         | = 62                   | = 62                   | = 62                  |
| 8          | NS                            | -125080                | -183296                | -126560               |
| 9          | KD                            | 4.927e-011             | 4.122e-011             | 4.894e-011            |
| 10         | Std. Error                    |                        |                        |                       |
| 11         | Kon                           | 15439436               | 11115797               | 35878912              |
| 12         | Koff                          | 0.0007568              | 0.0005209              | 0.00186               |
| 13         | Bmax                          | 40752                  | 49154                  | 98078                 |
| 14         | NS                            | 44096                  | 53614                  | 108556                |
| 15         | KD                            | 1.042e-011             | 7.533e-012             | 2.546e-011            |
| 16         | 95% CI (profile likelihood)   |                        |                        |                       |
| 17         | Kon                           | 107293894 to 164233913 | 100265212 to 144974475 | 80986081 to 220261140 |
| 18         | Koff                          | 0.005199 to 0.008247   | 0.004001 to 0.006142   | 0.003772 to 0.01203   |
| 19         | Bmax                          | 663978 to 826060       | 894387 to 1093520      | 436648 to 844686      |
| 20         | NS                            | -213499 to -41410      | -296827 to -79946      | -391079 to 55805      |
| 21         | Goodness of Fit               |                        |                        |                       |
| 22         | Degrees of Freedom            | 37                     | 37                     | 37                    |
| 23         | R square                      | 0.9287                 | 0.9506                 | 0.768                 |
| 24         | Absolute Sum of Squares       | 48214610596            | 45747517622            | 86277980718           |
| 25         | Sy.x                          | 36098                  | 35163                  | 48289                 |
| 26         | Constraints                   |                        |                        |                       |
| 27         | HotNM                         | HotNM = 0.9963         | HotNM = 0.9963         | HotNM = 0.9963        |
| 28         | Kon                           | Kon > 0                | Kon > 0                | Kon > 0               |
| 29         | Koff                          | Koff > 0               | Koff > 0               | Koff > 0              |
| 30         | Time0                         | Time0 = 62             | Time0 = 62             | Time0 = 62            |
